# Supplementary material for: Graphene Oxide Quantum Dots Reduce Oxidative Stress and Inhibit Neurotoxicity In Vitro and In Vivo through Catalase‐Like Activity and Metabolic Regulation
Source: PubMed Central journal article supplement (PMC5978962; doi:10.1002/advs.201700595), 2018-03-04
Supplement: ADVS-5-1700595-s001.pdf [file ADVS-5-1700595-s001.pdf]

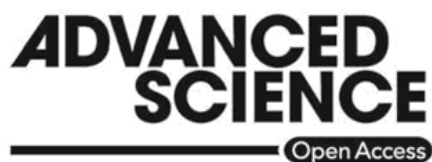

## Supporting Information

for *Adv. Sci.*, DOI: 10.1002/adv.201700595

Graphene Oxide Quantum Dots Reduce Oxidative Stress and Inhibit Neurotoxicity In Vitro and In Vivo through Catalase-Like Activity and Metabolic Regulation

*Chaoxiu Ren, Xiangang Hu, and Qixing Zhou\**

1 **Supporting Information**

2 **Graphene Oxide Quantum Dots Reduce Oxidative Stress and Inhibit Neurotoxicity *in vitro***  
3 **and *in vivo* through Catalase-like Activity and Metabolic Regulation**

4 Chaoxiu Ren, Qixing Zhou, Xiangang Hu

5 Key Laboratory of Pollution Processes and Environmental Criteria (Ministry of Education)/Tianjin Key

6 Laboratory of Environmental Remediation and Pollution Control, College of Environmental Science and

7 Engineering, Nankai University, Tianjin 300071, China.

8

9 Corresponding author: Qixing Zhou ([qxzhou523@163.com](mailto:qxzhou523@163.com)),

10 Xiangang Hu ([huxiangang@nankai.edu.cn](mailto:huxiangang@nankai.edu.cn)).

11 Fax, 0086-022-85358121; Tel, 0086-022-85358121.

12

13

14

15

**Page number: 14**

16

**Figure number:10**

17

18

19

20

21

22

## 23 **Experimental Section**

24 *Cell culture and zebrafish maintenance:* PC12 cells (Dingguo Changsheng Biotechnology CO.,  
25 LTD., China) were maintained in Dulbecco's modified Eagle's medium (high glucose) (DMEM-H,  
26 GENVIEW, USA) with 10% fetal bovine serum (FBS) at 37°C and 5% CO<sub>2</sub> (BPN-240RHP, Yi  
27 Heng Scientific Instrument Co., Ltd., China). Zebrafish (wild-type AB strain, 6 month) were  
28 maintained at 28°C with a 14:10 h light/dark cycle and fed living brine shrimp twice daily. A  
29 continuous water cycling system was used to maintain water quality. Embryos were collected by  
30 natural spawning and raised in E3 solution (5 mM NaCl, 0.17 mM KCl, 0.33 mM CaCl<sub>2</sub>, 0.33 mM  
31 MgSO<sub>4</sub>, pH 7.4). All embryos were incubated at 28°C in a climate-controlled cabinet (SPX-300I-C,  
32 BOXUN, China) during development.

33 *Characteristics of graphene oxide quantum dots (GOQDs):* GOQDs were purchased from  
34 XFNANO (XF042, China). Atomic force microscopy (AFM) and HRTEM, Hitachi HT7700, Japan)  
35 were conducted on a Nanoscope 4 (Veeco, USA) and a JEM-2010 FEF (JEOL, Japan), respectively.  
36 The hydrodynamic diameters (Hds) of the GOQDs in E3 medium and the cell culture medium were  
37 detected to evaluate the size distribution of the GOQDs with a Zetasizer Nano ZS90 (Malvern, UK).

38 *Cell toxicity assays and cell morphology:* PC12 cells were treated with  
39 1-methyl-4-phenyl-pyridinium ion (MPP<sup>+</sup>, Sigma, USA) for 24 h in with or without preincubation  
40 with GOQDs. Cells were incubated with cell culture medium (control) or GOQDs alone for 24 h.  
41 Cell viability was measured with Cell Counting Kit-8 (CCK-8, Beyotime, China) as described  
42 previously.<sup>[1]</sup> The absorbance of each well was measured at 450 nm using a microplate reader  
43 (BioTek H4 MLFA, USA). The cells in the control group had a good growth status, as shown in  
44 Figure 1b. The absorbance of the control group was set as 100% cell viability, and the absorbance of  
45 the treated group divided by that of the control group indicated the cell viability of the treated group.

46 Three replicate wells were used for each sample and the control. The living cell morphology images  
47 were obtained with an inverted microscope (OlympusX71, Olympus, Japan).

48 *Mortality and malformation in larval zebrafish:* Larval zebrafish were preincubated with GOQDs  
49 ( $100 \mu\text{g mL}^{-1}$ ) from 6 h post-fertilization (hpf) to 72 hpf and then treated with  $\text{MPP}^+$  (1.5 mM) until  
50 120 hpf. Meanwhile, the groups of larval zebrafish were treated with E3 medium (control), GOQDs  
51 or  $\text{MPP}^+$ . The mortality and malformation rates and images of the larval zebrafish were recorded at  
52 120 hpf by light microscopy (Olympus ZL 61, Olympus, Japan).

53

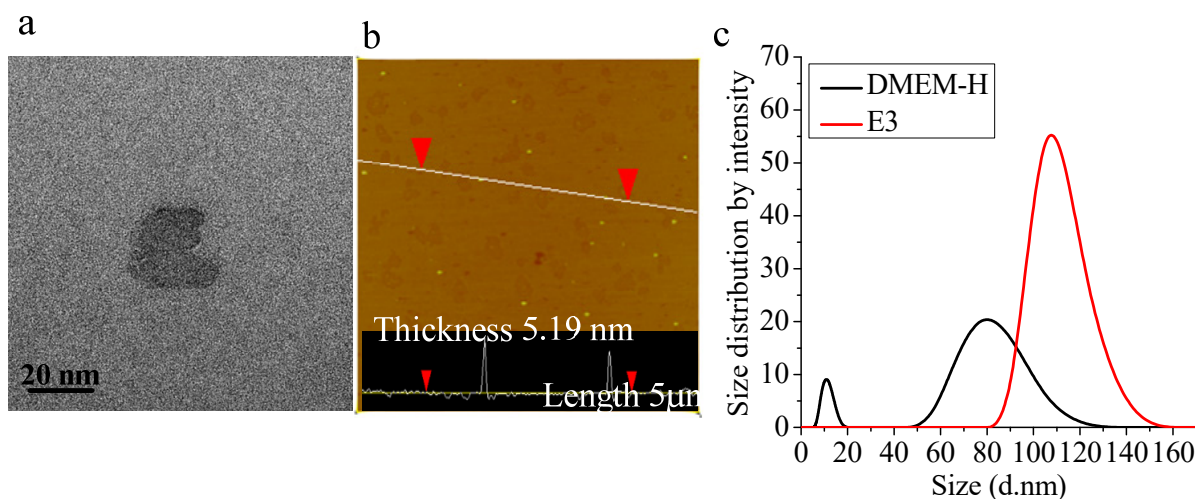

54

55 **Figure S1** Characteristics of nanomaterials. a) TEM imaging. b) AFM imaging. c) Size distribution  
56 of the GOQDs in complete DMEM-H with 10% FBS (black line) and in E3 medium (red line).

57

58 The lateral sizes and thicknesses of the GOQDs were determined by TEM and AFM (Figure S1a  
59 and S1b). The lateral sizes ranged from approximately 20 to 40 nm. The thicknesses of the GOQDs  
60 ranged from 4.18 to 5.19 nm. The size distribution (Figure S1c) revealed that the hydrodynamic  
61 diameters of the GOQDs were approximately 75 nm in DMEM-H with 10% FBS (complete  
62 medium) and approximately 105 nm in E3 medium. The small fractions with hydrodynamic

63 diameters from 6.5 to 18 nm were from the macromolecule compositions of the complete medium.

64

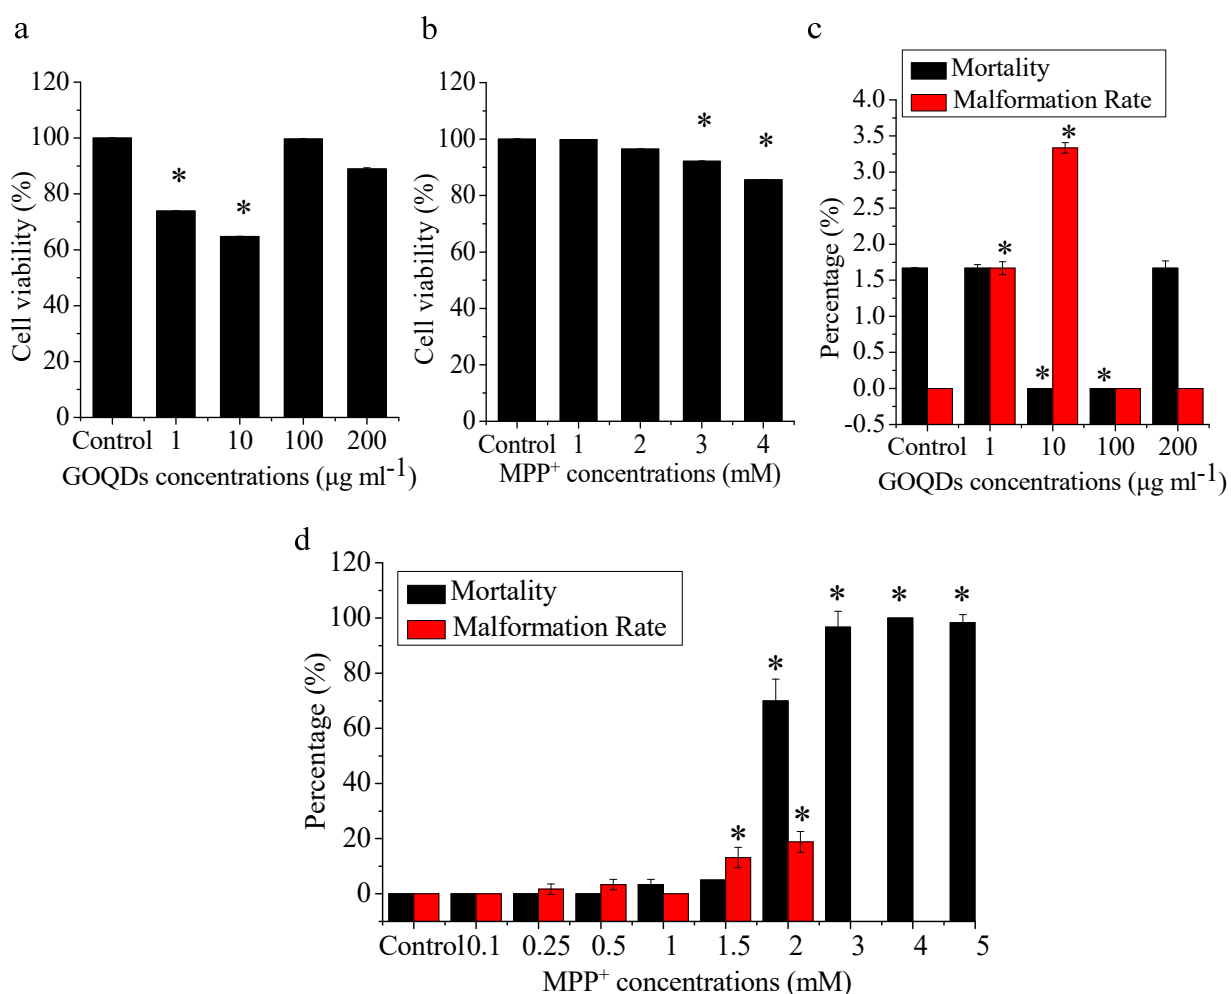

65

66 **Figure S2** Effects of GOQDs and MPP<sup>+</sup> on PC12 cells and larval zebrafish. a) Cell viability of

67 PC12 cells incubated with GOQDs. b) Cell viability of PC12 cells incubated with MPP<sup>+</sup>. c)

68 Mortality and malformation rates of larval zebrafish treated with GOQDs. d) Mortality and

69 malformation rates of larval zebrafish treated with MPP<sup>+</sup>. Measurement for each treatment was

70 repeated in triplicate. The error bars were not obvious when the standard deviations were small.

71

72 GOQDs at 1 to 200  $\mu\text{g mL}^{-1}$  were used to assess cell viability prior to use. At a concentration of

73 100  $\mu\text{g mL}^{-1}$ , cell viability was 99.67% compared with 100% for the control, indicating that the

74 GOQDs were biocompatible with PC12 cells. In the subsequent experiments, GOQDs at 100  $\mu\text{g}$   
75  $\text{mL}^{-1}$  were used for the treatments. Furthermore, cell viability decreased with increasing  
76 concentrations of  $\text{MPP}^+$  from 1 to 4 mM and was significantly decreased by 15% at 4 mM  $\text{MPP}^+$   
77 (Figure S2b). In the present study, 4 mM  $\text{MPP}^+$  was used to induce neurotoxicity in PC12 cells.  
78 Various concentrations of GOQDs and  $\text{MPP}^+$  were examined to assess the mortality and  
79 malformation rates in larval zebrafish prior to the treatments with GOQDs (Figure S2c and S2d).  
80 The highest mortality and malformation rates of the zebrafish treated with GOQDs (1-200  $\mu\text{g mL}^{-1}$ )  
81 were 1.7% and 3.3%, respectively. The results suggested that the GOQDs were biocompatible at the  
82 tested concentrations ranging from 1-200  $\mu\text{g mL}^{-1}$ . In addition, Jasim et al. reported that glomerular  
83 excretion of significant amounts of GO did not induce any signs of acute nephrotoxicity or  
84 glomerular barrier dysfunction.<sup>[2]</sup> Therefore, GOQDs were still safe to use after biokinetic  
85 processing and excretion. In the present study, GOQDs at the biocompatible concentration of 100  
86  $\mu\text{g mL}^{-1}$  were used. The mortality rate of zebrafish treated with 2 mM  $\text{MPP}^+$  was 70%, which was  
87 too high for further experiments, so 1.5 mM  $\text{MPP}^+$  was chosen for the zebrafish experiments.

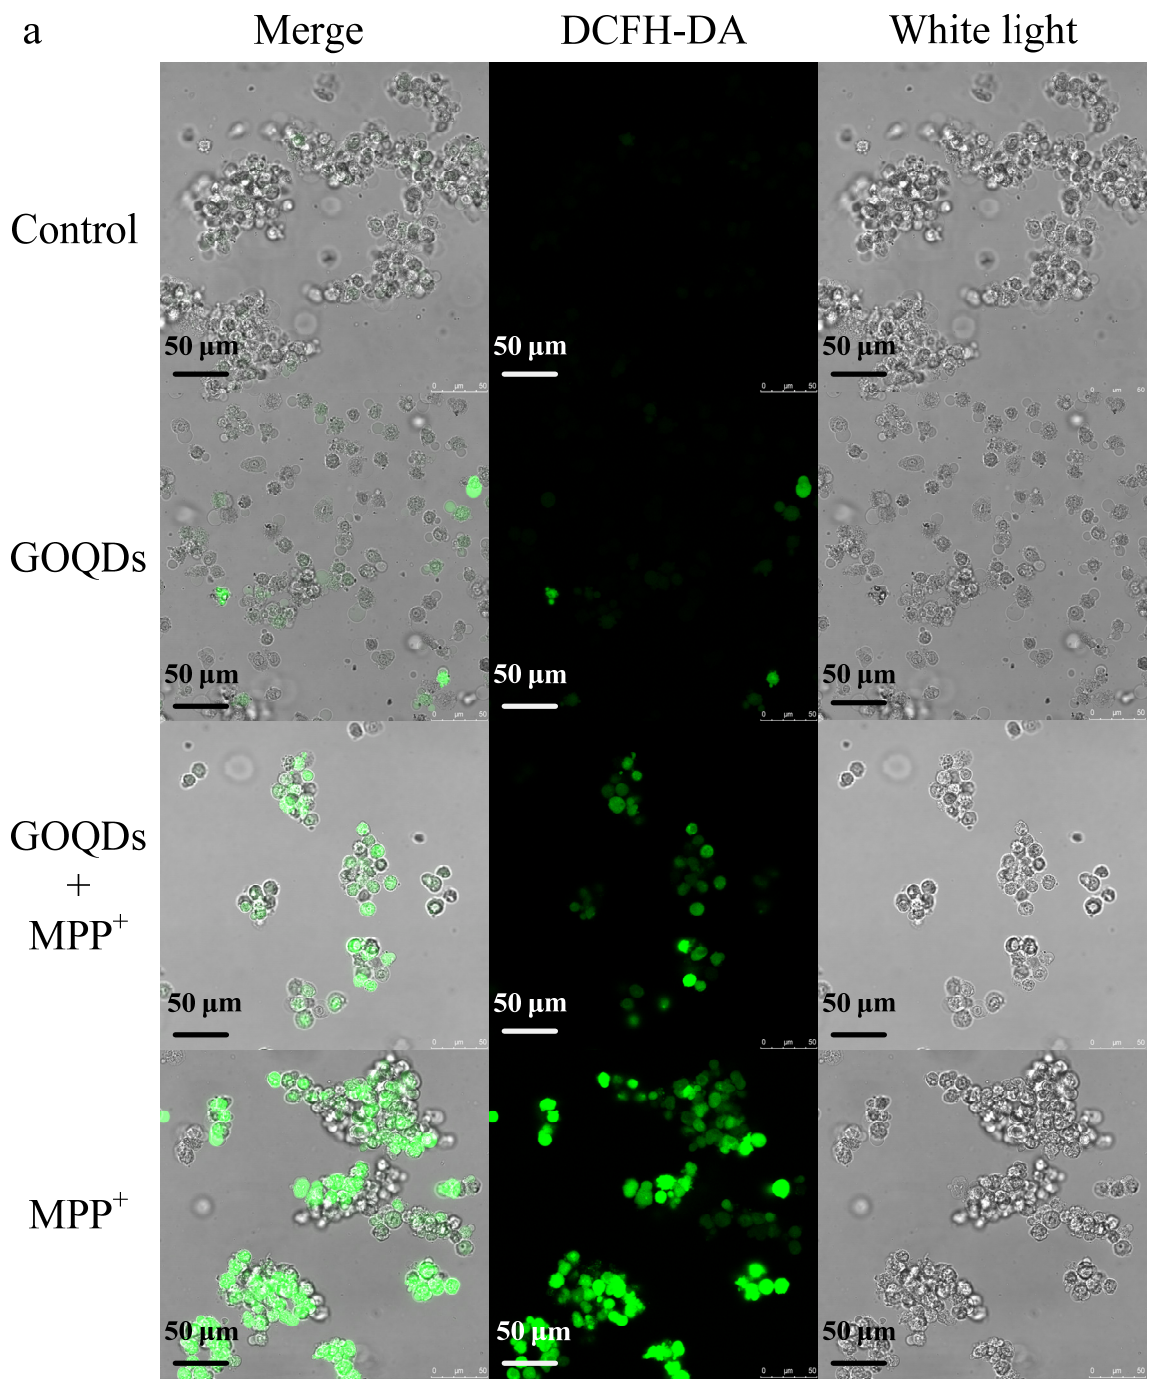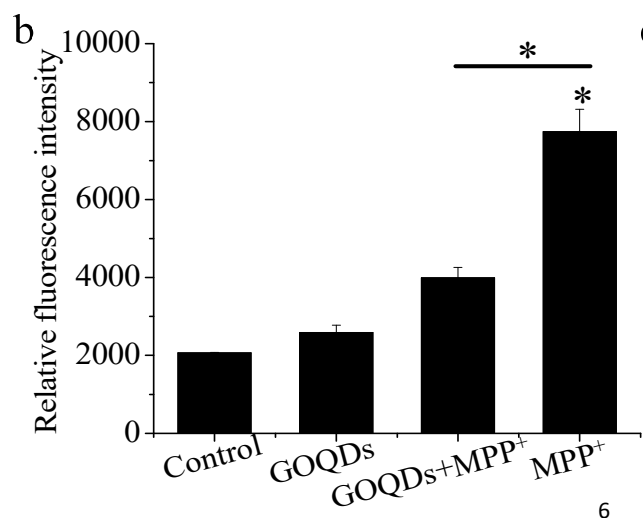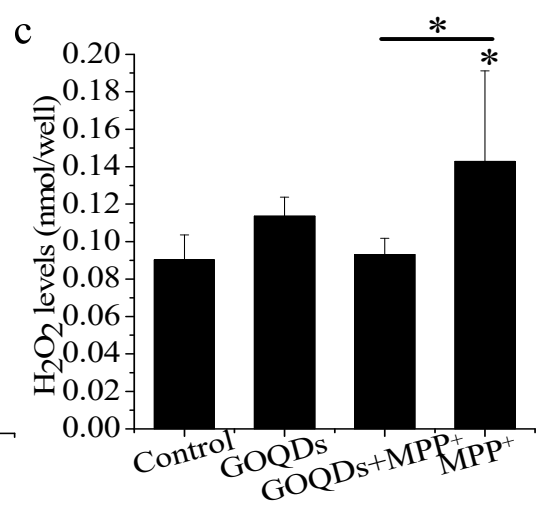

89 **Figure S3** Effects of GOQDs on oxidative stress induced by MPP<sup>+</sup>. a) LSCM images of PC12 cells  
 90 stained with 2',7'-dichlorofluorescein diacetate (DCFH-DA). b) Quantification of ROS levels in  
 91 PC12 cells. c) H<sub>2</sub>O<sub>2</sub> levels in PC12 cells. \**P*<0.05, compared with the control. \**P*<0.05,  
 92 GOQDs-pretreated group compared with the MPP<sup>+</sup>-treated group.

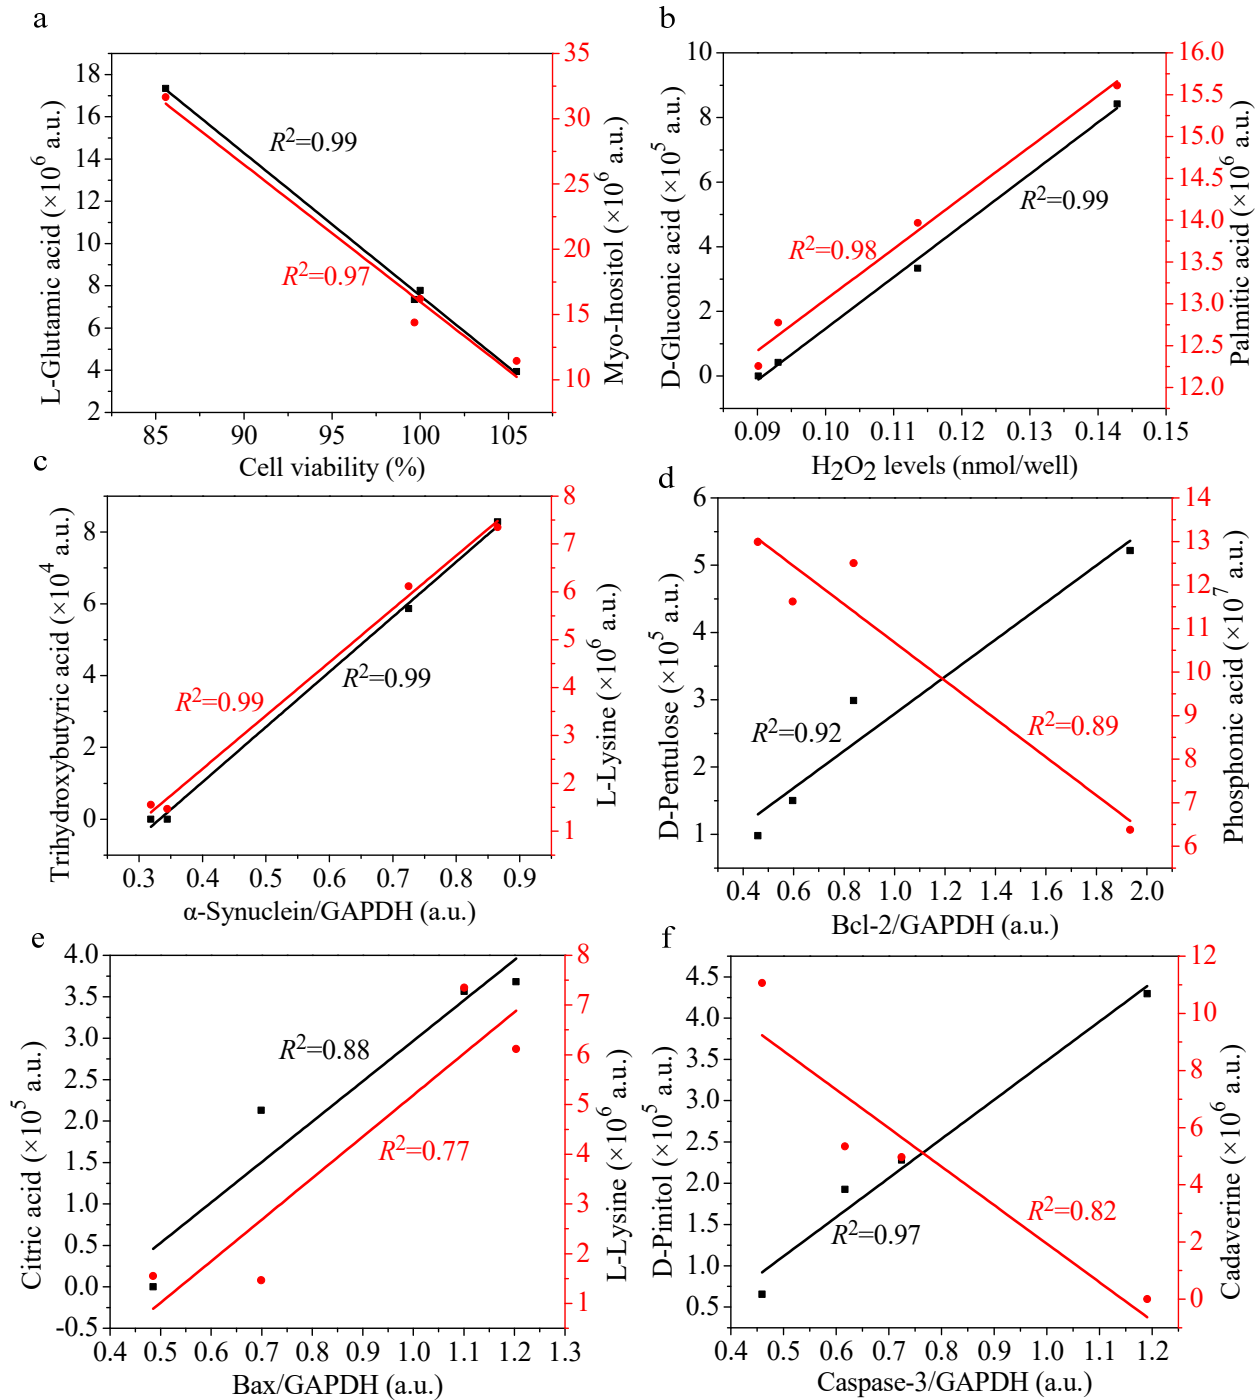

93  
 94 **Figure S4** Correlation analysis of pathophysiological indicator changes and the corresponding two



95 metabolites with the largest VIP values by linear fitting *in vitro*. a) Correlation analysis of cell  
96 viability with L-glutamic acid and myo-inositol. b) Correlation analysis of H<sub>2</sub>O<sub>2</sub> levels with  
97 D-gluconic acid and palmitic acid. c) Correlation analysis of  $\alpha$ -synuclein with trihydroxybutyric  
98 acid and L-lysine. d) Correlation analysis of Bcl-2 with D-pentulose and phosphonic acid. e)  
99 Correlation analysis of Bax with citric acid and L-lysine. f) Correlation analysis of caspase-3 with  
100 D-pinitol and cadaverine.

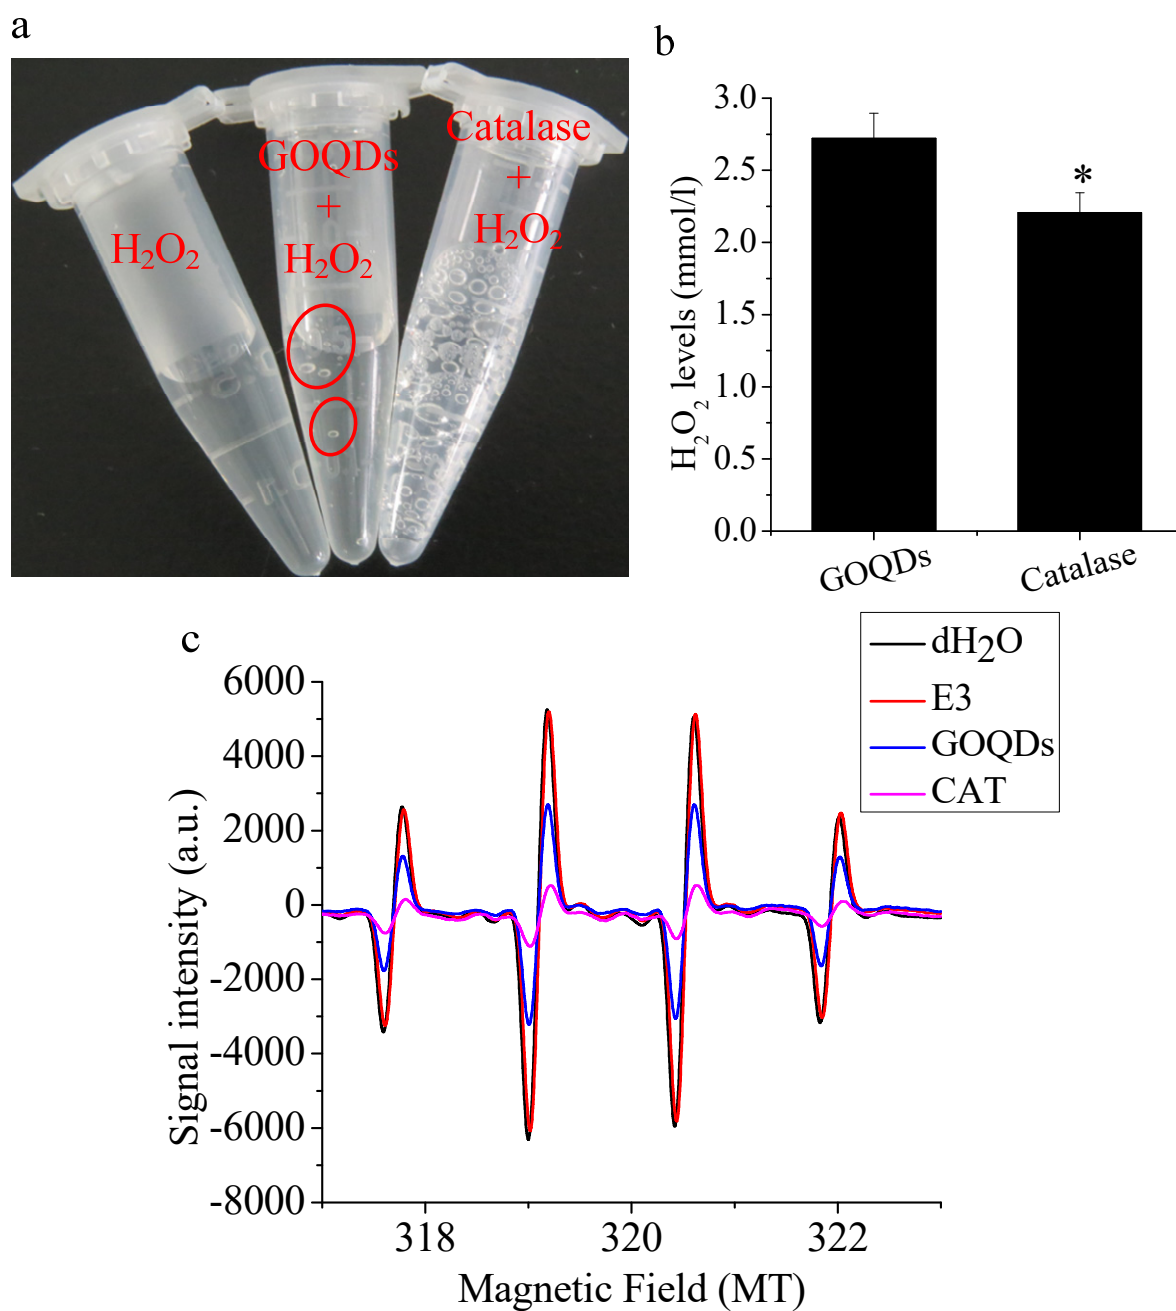

102 **Figure S5** Catalase-like activity of GOQDs *in vitro*. a) Bubble production indicating the  
103 decomposition of H<sub>2</sub>O<sub>2</sub> by GOQDs and catalase. The bubbles are circled in red in the GOQDs  
104 group. b) Relative levels of H<sub>2</sub>O<sub>2</sub> after incubation with GOQDs (100 μg mL<sup>-1</sup>) or catalase (4 U  
105 mL<sup>-1</sup>). c) •OH signal intensity of Fenton reactions incubated with distilled water (dH<sub>2</sub>O, black), E3  
106 (red), GOQDs (blue) or catalase (CAT, pink). The Fenton reaction formulas were as follows: Fe<sup>2+</sup> +  
107 H<sub>2</sub>O<sub>2</sub> → Fe<sup>3+</sup> + OH<sup>-</sup> + •OH;<sup>[3]</sup> H<sub>2</sub>O<sub>2</sub> + Fe<sup>3+</sup> → Fe<sup>2+</sup> + O<sub>2</sub> + 2H<sup>+</sup>; and O<sub>2</sub> + Fe<sup>3+</sup> → Fe<sup>2+</sup> + O<sub>2</sub>•<sup>-</sup>.  
108 \*P<0.05.

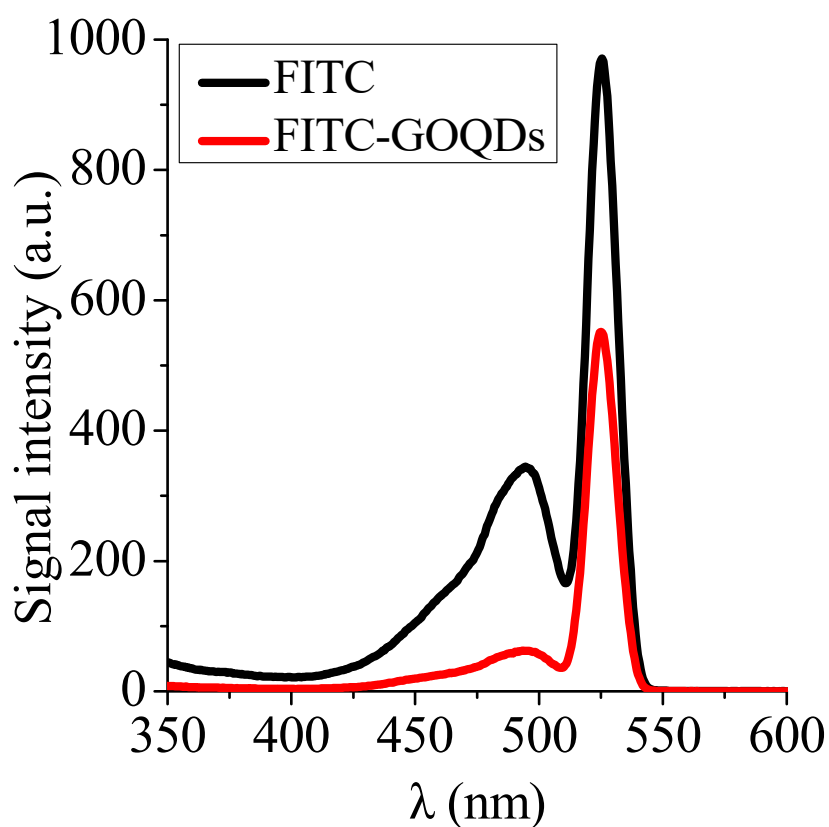

109

110 **Figure S6** UV-vis absorption spectra of FITC (black) and FITC-GOQDs (red).

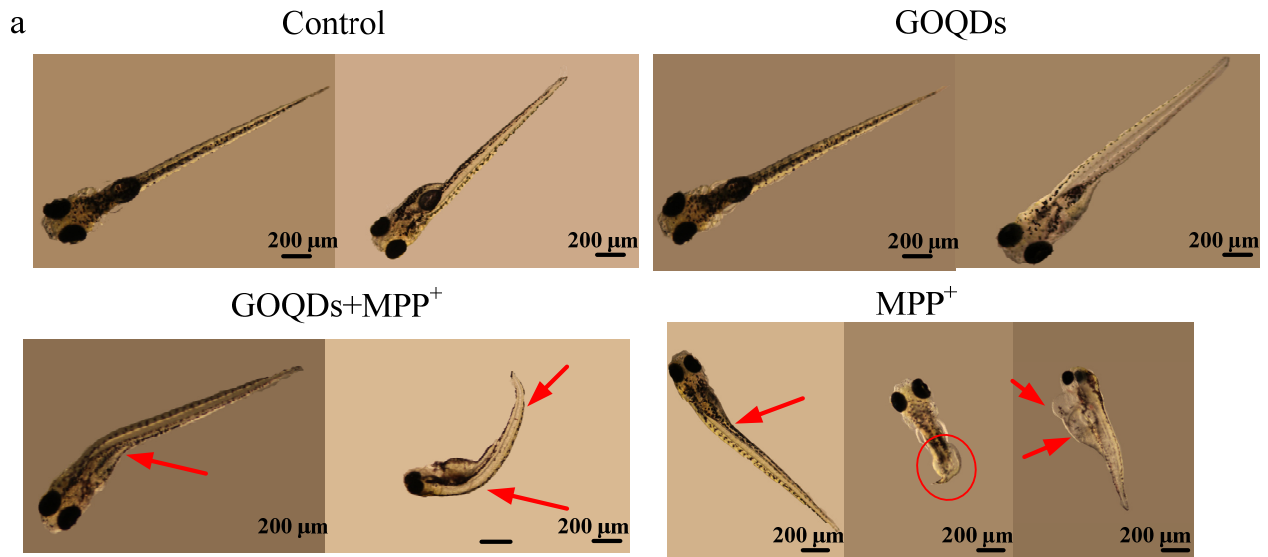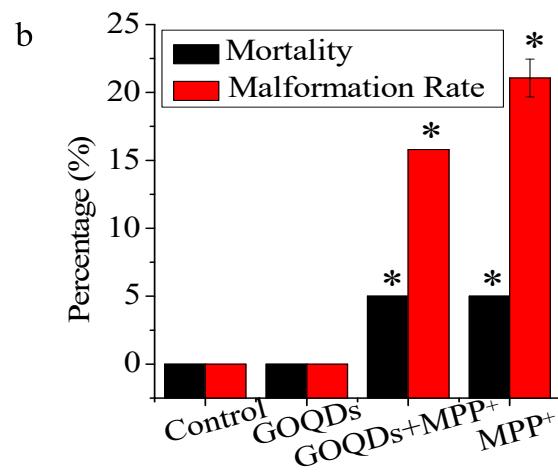

111

112 **Figure S7** Effects of GOQDs on the MPP<sup>+</sup>-associated mortality and malformation rates *in vivo*. a)

113 Malformation in larvae treated with MPP<sup>+</sup> with or without preincubation with GOQDs. Tail/spinal

114 curvature, rumplessness and pericardial/yolk sac edema are denoted by red arrows or circles. b)

115 Quantification of the mortality and malformation rates. \* $P < 0.05$ , compared with the control.

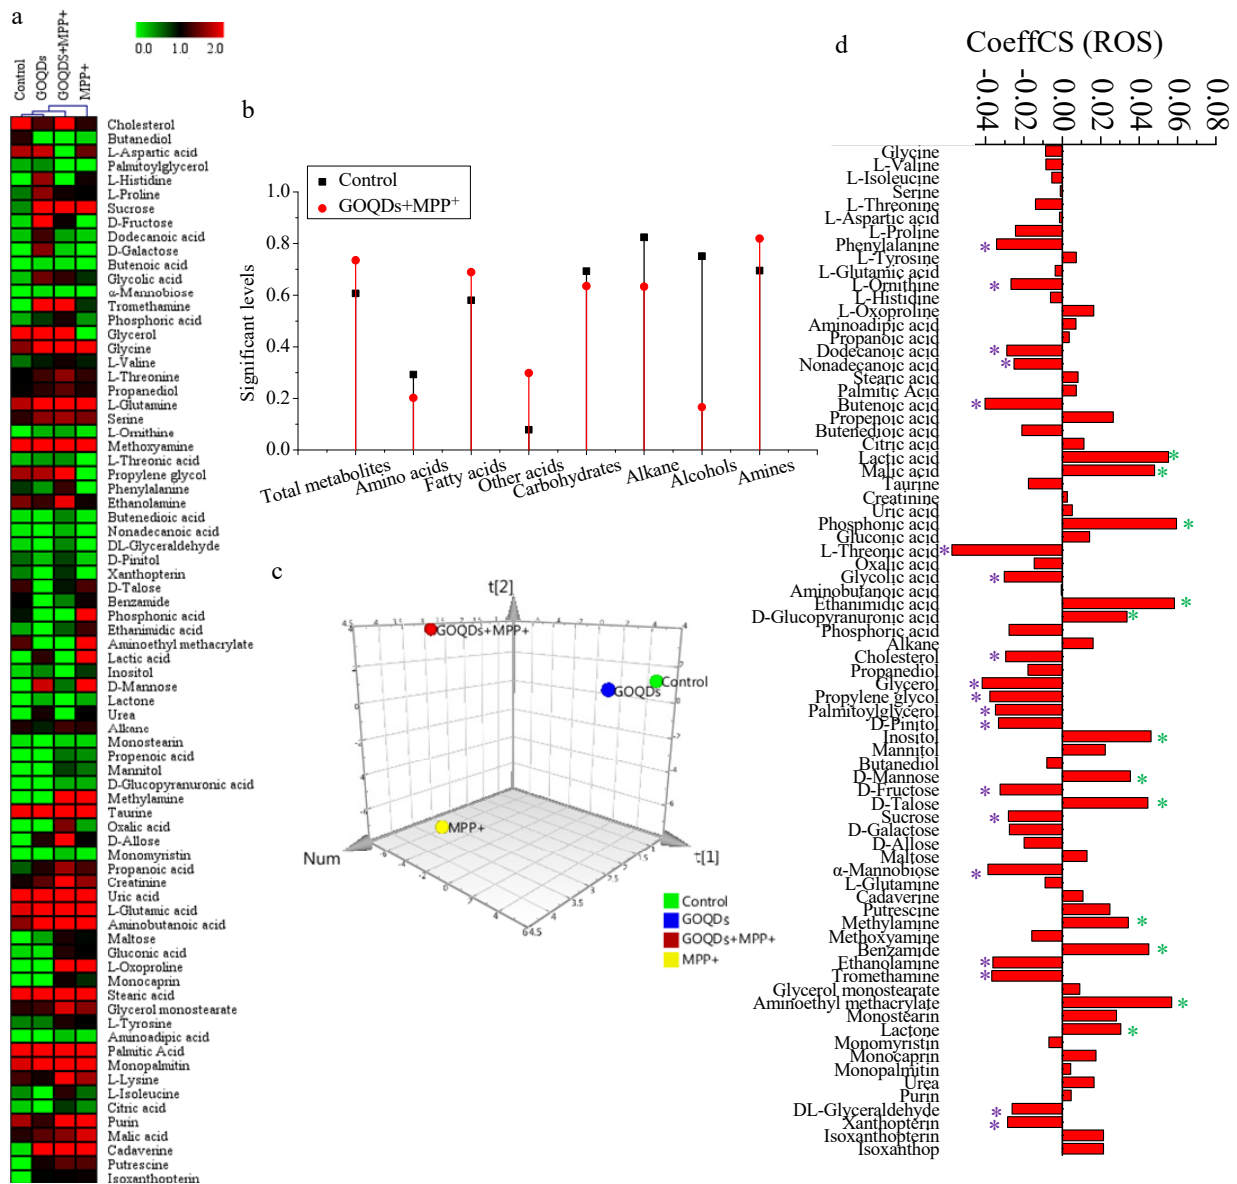

116

117 **Figure S8** Effects of GOQDs on MPP<sup>+</sup>-induced metabolomics in zebrafish brains. a) Heat maps of  
 118 identified metabolites. b) Significant levels of metabolites in the control and GOQDs+MPP<sup>+</sup> groups  
 119 compared with the MPP<sup>+</sup> group. c) Metabolic cluster analysis using PCA scores plot. d) CoeffCS of  
 120 metabolites as the X variable and ROS as the Y variable by PLS. The metabolites labeled with  
 121 asterisks represent the metabolites with a VIP greater than one. The metabolites labeled with green

122 and purple asterisks represent the metabolites that positively and negatively contribute to ROS,  
 123 respectively.

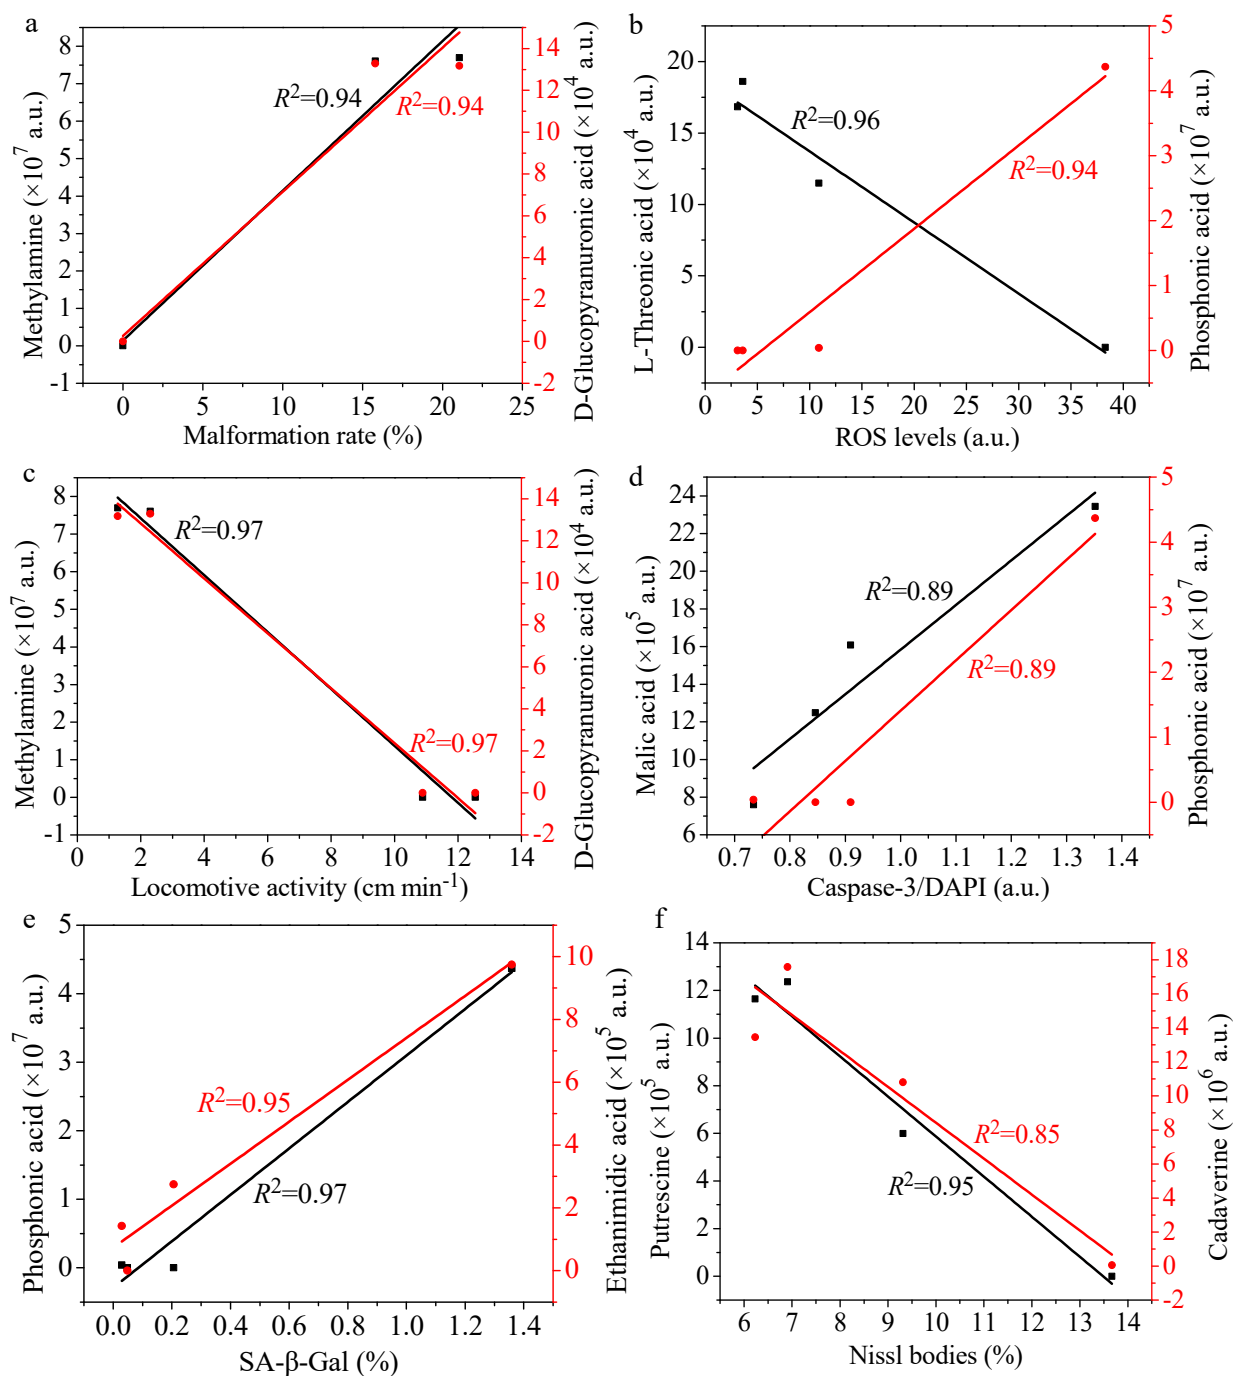

124  
 125 **Figure S9.** Correlation analysis of pathophysiological indicator changes and the corresponding two  
 126 metabolites with the largest VIP values by linear fitting *in vivo*. a) Correlation analysis of the  
 127 malformation rate with methylamine and D-glucopyranuronic acid. b) Correlation analysis of ROS

128 levels with L-threonic acid and phosphonic acid. c) Correlation analysis of locomotive activity with  
 129 methylamine and D-glucopyranuronic acid. d) Correlation analysis of caspase-3 with malic acid and  
 130 phosphonic acid. e) Correlation analysis of SA- $\beta$ -Gal with phosphonic acid and ethanimidic acid. (f)  
 131 Correlation analysis of Nissl bodies with putrescine and cadaverine.

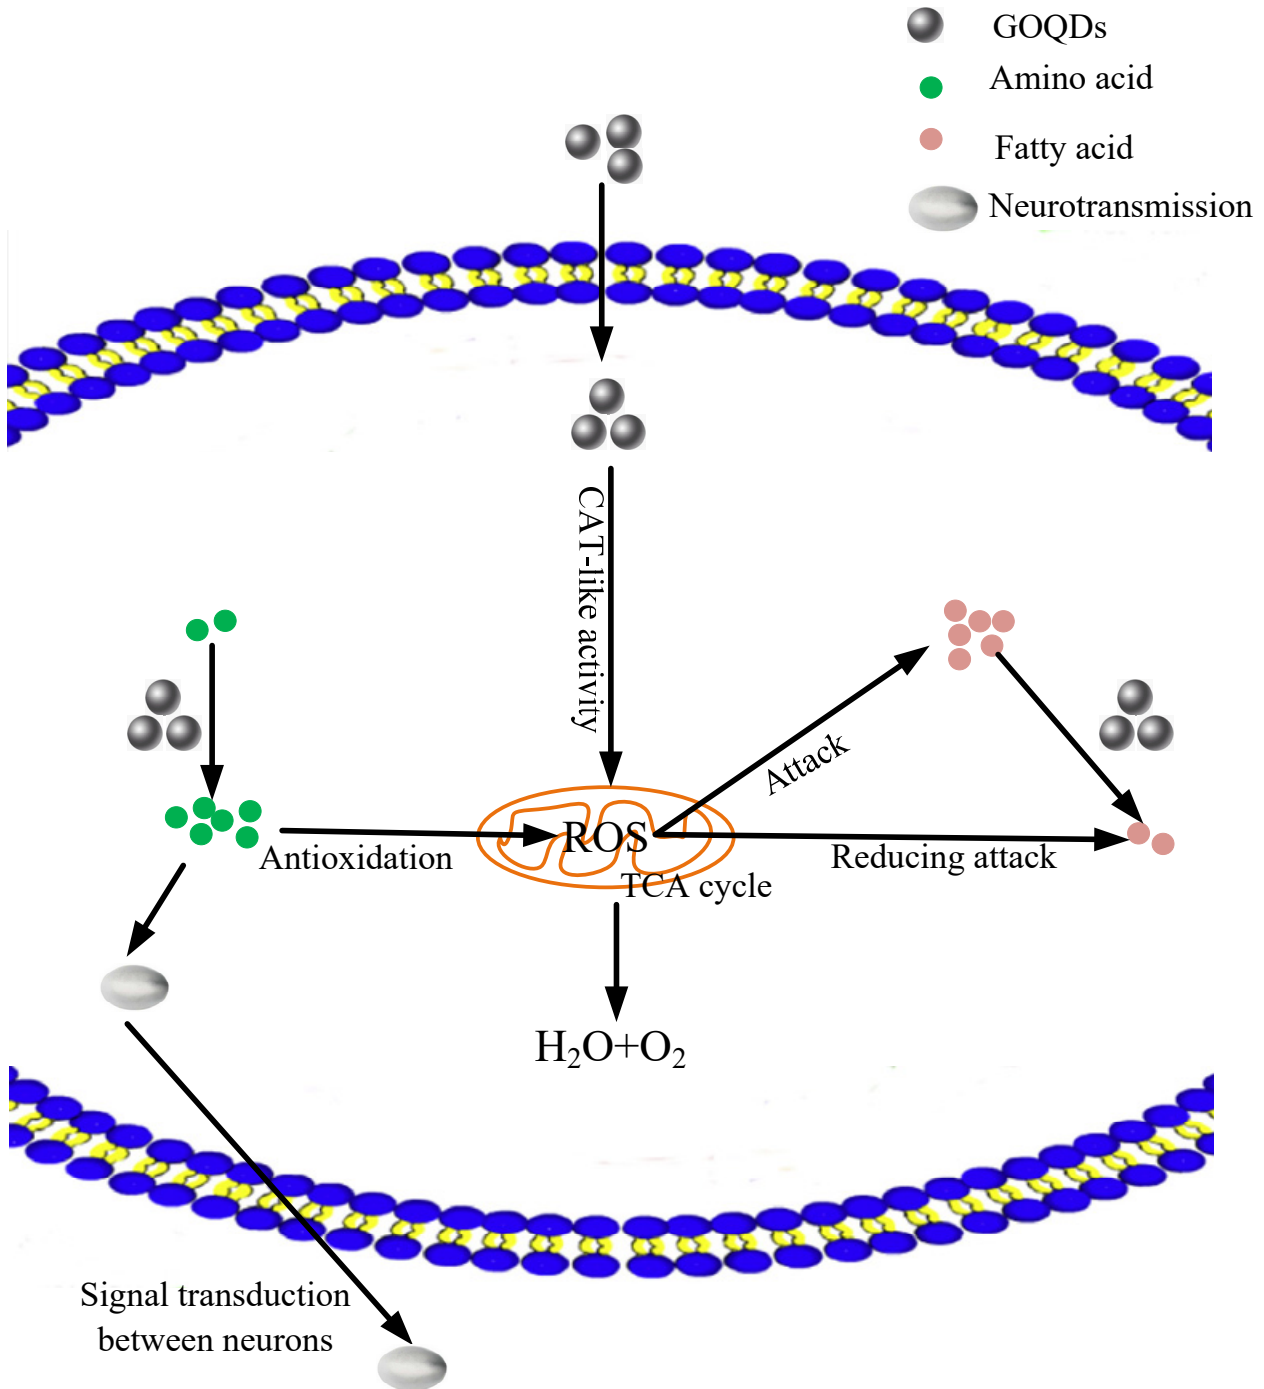

132  
 133 **Figure S10** Diagram of GOQDs protecting PC12 cells and larval zebrafish from neurotoxicity and  
 134 the underlying mechanism. Two green balls to six represents the upregulation of amino acids. In

135 contrast, six pink balls to two represents the downregulation of fatty acids. CAT, catalase.

136

137 **References**

- 138 [1] C. C. Ge, G. Fang, X. M. Shen, Y. Chong, W. G. Wamer, X. F. Gao, Z. F. Chai, C. Y. Chen, J.  
139 J. Yin, *ACS Nano* **2016**, *10*, 10436.
- 140 [2] D. A. Jasim, S. Murphy, L. Newman, A. Mironov, E. Prestat, J. McCaffrey, C.  
141 Ménard-Moyon, A. F. Rodrigues, A. Bianco, S. Haigh, R. Lennon, K. Kostarelos, *ACS Nano*  
142 **2016**, *10*, 10753.
- 143 [3] B. C. Qiu, Y. X. Deng, M. M. Du, M. Y. Xing, J. L. Zhang, *Sci. Rep.* **2016**, *6*, 10.
